# Supplementary material for: Disentangling function from topology to infer the network properties of disease genes
Source: PubMed Central journal article supplement (PMC3614482; doi:10.1186/1752-0509-7-5), 2013-01-16
Supplement: 1752-0509-7-5-S1.pdf [file 1752-0509-7-5-S1.pdf]

|                      | number of proteins | number of interactions |
|----------------------|--------------------|------------------------|
| BioGRID              | 10042              | 51756                  |
| Bossi                | 10229              | 80651                  |
| HitPredict (HT/HC)   | 7767               | 35209                  |
| HitPredict (Full/HC) | 8302               | 42015                  |

**Table 1. Network statistics.** For each of the four networks used in this study, we give the number of proteins and the number of interactions amongst them.

|                 |           | Degree                   | Clustering              | Betweenness                 |
|-----------------|-----------|--------------------------|-------------------------|-----------------------------|
| monogenic       | constr.   | <b>31.881</b> (1.5e-24)  | <b>0.265</b> (0.0e+00)  | 80943.442 (3.8e-200)        |
|                 | unconstr. | 39.939                   | 1.615                   | 53750.948                   |
| OMIM            | constr.   | 48.445 (0.0e+00)         | <b>0.244</b> (0.0e+00)  | 103209.311 (4.7e-163)       |
|                 | unconstr. | 11.474                   | 0.972                   | 90710.830                   |
| cancerMut       | constr.   | <b>254.584</b> (0.0e+00) | <b>0.806</b> (6.5e-62)  | <b>324639.680</b> (0.0e+00) |
|                 | unconstr. | 314.122                  | 0.923                   | 390282.497                  |
| cancerOverExpr  | constr.   | <b>63.300</b> (0.0e+00)  | <b>0.294</b> (1.6e-271) | <b>48880.825</b> (3.6e-280) |
|                 | unconstr. | 124.901                  | 0.635                   | 80852.172                   |
| cancerUnderExpr | constr.   | <b>52.049</b> (0.0e+00)  | <b>0.121</b> (5.8e-303) | <b>43267.235</b> (9.8e-287) |
|                 | unconstr. | 112.447                  | 0.705                   | 78833.287                   |

**Table 2. Average area under the difference plots (see Figure 4 in main paper).** For each percentile in the interquartile range, we compute the absolute value of the difference in the value of the topological feature between the disease set and the average in the sample sets, and then sum across the interquartile range. In 12 out of 15 cases, these values are smaller for constrained samples than they are for unconstrained samples, indicating that in these cases the topological features of the constrained samples are closer to the disease sets than those of the unconstrained samples. **We compare the distributions of area under the difference plots for the function-constrained and unconstrained samples using the Wilcoxon’s rank sum test and report the  $p$ -values in parenthesis next to the value for constrained samples. The values for the constrained samples are bolded whenever found significantly smaller ( $p < 0.05$ ) than the values for the unconstrained samples.**

|                 |           | Degree |       |       | Clustering |       |       | Betweenness |       |       |
|-----------------|-----------|--------|-------|-------|------------|-------|-------|-------------|-------|-------|
|                 |           | 25%    | 50%   | 75%   | 25%        | 50%   | 75%   | 25%         | 50%   | 75%   |
| monogenic       | constr.   | 0.982  | 0.224 | 0.304 | —          | 0.038 | 0.357 | 0.000       | 0.000 | 0.000 |
|                 | unconstr. | 0.970  | 0.405 | 0.041 | —          | 0.001 | 0.000 | 0.109       | 0.006 | 0.008 |
| OMIM            | constr.   | 1.000  | 0.000 | 0.000 | —          | 0.000 | 0.333 | 0.000       | 0.000 | 0.000 |
|                 | unconstr. | 1.000  | 0.656 | 0.043 | —          | 0.028 | 0.000 | 0.000       | 0.000 | 0.000 |
| cancerMut       | constr.   | 0.000  | 0.000 | 0.000 | 0.000      | 0.000 | 0.401 | 0.000       | 0.000 | 0.000 |
|                 | unconstr. | 0.000  | 0.000 | 0.000 | 0.000      | 0.000 | 0.227 | 0.000       | 0.000 | 0.000 |
| cancerOverExpr  | constr.   | 0.351  | 0.000 | 0.004 | —          | 0.004 | 0.469 | 0.000       | 0.000 | 0.021 |
|                 | unconstr. | 0.000  | 0.000 | 0.000 | —          | 0.000 | 0.230 | 0.000       | 0.000 | 0.000 |
| cancerUnderExpr | constr.   | 1.000  | 0.005 | 0.020 | —          | 0.175 | 0.440 | 0.000       | 0.000 | 0.016 |
|                 | unconstr. | 0.707  | 0.000 | 0.000 | —          | 0.000 | 0.002 | 0.000       | 0.000 | 0.000 |

**Table 3.** Uncorrected empirical  $p$ -values, showing the significance of the difference between disease sets and samples (full BioGRID network, Informative terms). We use 1000 function-constrained and unconstrained samples and estimate the fraction of the 1000 that have more extreme values than the disease set at the 25th, 50th and 75th percentiles. Dashes indicate cases where the values for the disease set and all the samples are 0.

2

|                 |           | Degree                   | Clustering              | Betweenness                 |
|-----------------|-----------|--------------------------|-------------------------|-----------------------------|
| monogenic       | constr    | 35.752 (2.6e-76)         | <b>0.272</b> (0.0e+00)  | 69049.337 (5.3e-164)        |
|                 | unconstr. | 25.322                   | 1.401                   | 48685.396                   |
| OMIM            | constr    | 56.622 (0.0e+00)         | <b>0.326</b> (0.0e+00)  | 100207.350 (5.2e-110)       |
|                 | unconstr. | 20.108                   | 0.844                   | 91665.699                   |
| cancerMut       | constr    | <b>219.299</b> (0.0e+00) | <b>0.714</b> (1.5e-242) | <b>298085.415</b> (0.0e+00) |
|                 | unconstr. | 310.151                  | 0.969                   | 373928.391                  |
| cancerOverExpr  | constr    | <b>43.201</b> (0.0e+00)  | <b>0.279</b> (9.7e-245) | <b>30911.929</b> (1.7e-303) |
|                 | unconstr. | 102.016                  | 0.548                   | 64035.740                   |
| cancerUnderExpr | constr    | <b>39.741</b> (0.0e+00)  | <b>0.167</b> (9.5e-302) | <b>32561.069</b> (3.6e-303) |
|                 | unconstr. | 94.616                   | 0.724                   | 67643.124                   |

Table 4. Area under the difference plots (BioGRID network, 25th - 75th percentile, all terms).

|                 |           | Degree                    | Clustering              | Betweenness                   |
|-----------------|-----------|---------------------------|-------------------------|-------------------------------|
| monogenic       | constr    | <b>269.420</b> (1.7e-61)  | <b>1.871</b> (8.5e-305) | <b>1576716.468</b> (1.1e-76)  |
|                 | unconstr. | 334.266                   | 4.506                   | 1886125.121                   |
| OMIM            | constr    | <b>270.317</b> (2.1e-23)  | <b>0.813</b> (0.0e+00)  | <b>1448335.491</b> (6.0e-301) |
|                 | unconstr. | 303.395                   | 2.936                   | 1800387.363                   |
| cancerMut       | constr    | <b>849.024</b> (0.0e+00)  | <b>2.702</b> (6.5e-165) | <b>2539088.477</b> (1.1e-307) |
|                 | unconstr. | 1249.390                  | 3.734                   | 3572482.428                   |
| cancerOverExpr  | constr    | <b>269.325</b> (5.7e-283) | 2.142 (9.9e-06)         | 714510.996 (3.5e-05)          |
|                 | unconstr. | 409.109                   | 2.047                   | 578670.292                    |
| cancerUnderExpr | constr    | <b>185.315</b> (5.9e-306) | <b>0.989</b> (2.9e-63)  | <b>202111.157</b> (1.4e-135)  |
|                 | unconstr. | 355.150                   | 1.311                   | 623950.033                    |

Table 5. Area under the difference plots (BioGRID Full network, whole distribution, informative terms). The whole distribution is considered, instead of the 25th-75th percentile range as in Table S2.

|                 |           | Degree                    | Clustering             | Betweenness                  |
|-----------------|-----------|---------------------------|------------------------|------------------------------|
| monogenic       | constr    | <b>45.184</b> (9.4e-119)  | <b>0.857</b> (0.0e+00) | 126300.285 (2.2e-166)        |
|                 | unconstr. | 64.660                    | 3.128                  | 99172.000                    |
| OMIM            | constr    | 48.626 (2.2e-193)         | <b>1.144</b> (0.0e+00) | 120300.116 (4.1e-45)         |
|                 | unconstr. | 35.267                    | 2.939                  | 113664.774                   |
| cancerMut       | constr    | <b>194.382</b> (6.8e-225) | <b>1.238</b> (0.0e+00) | <b>275542.322</b> (3.9e-294) |
|                 | unconstr. | 246.691                   | 2.523                  | 337117.670                   |
| cancerOverExpr  | constr    | <b>117.403</b> (0.0e+00)  | <b>1.157</b> (0.0e+00) | <b>39602.370</b> (2.1e-282)  |
|                 | unconstr. | 207.455                   | 2.476                  | 79597.078                    |
| cancerUnderExpr | constr    | <b>76.040</b> (0.0e+00)   | <b>1.073</b> (0.0e+00) | <b>56693.246</b> (4.0e-298)  |
|                 | unconstr. | 171.433                   | 2.765                  | 102528.439                   |

Table 6. Area under the difference plots (Bossi network, 25th - 75th percentile, informative terms)

|                 |           | Degree                    | Clustering             | Betweenness                 |
|-----------------|-----------|---------------------------|------------------------|-----------------------------|
| monogenic       | constr    | 56.142 (1.4e-27)          | <b>0.737</b> (0.0e+00) | 134562.445 (5.7e-304)       |
|                 | unconstr. | 49.355                    | 2.757                  | 90571.337                   |
| OMIM            | constr    | 66.754 (0.0e+00)          | <b>0.854</b> (0.0e+00) | 138222.652 (1.9e-293)       |
|                 | unconstr. | 27.999                    | 2.708                  | 116443.527                  |
| cancerMut       | constr    | <b>210.743</b> (4.1e-274) | <b>0.796</b> (0.0e+00) | <b>273304.868</b> (0.0e+00) |
|                 | unconstr. | 264.334                   | 2.320                  | 331739.155                  |
| cancerOverExpr  | constr    | <b>84.614</b> (0.0e+00)   | <b>0.576</b> (0.0e+00) | <b>25683.587</b> (0.0e+00)  |
|                 | unconstr. | 181.792                   | 2.189                  | 69806.237                   |
| cancerUnderExpr | constr    | <b>52.443</b> (0.0e+00)   | <b>0.741</b> (0.0e+00) | <b>32133.205</b> (0.0e+00)  |
|                 | unconstr. | 154.195                   | 2.705                  | 86775.846                   |

Table 7. Area under the difference plots (Bossi network, 25th - 75th percentile, all terms)

|                 |           | <b>Degree</b>             | <b>Clustering</b>      | <b>Betweenness</b>           |
|-----------------|-----------|---------------------------|------------------------|------------------------------|
| monogenic       | constr    | <b>393.612</b> (0.0e+00)  | <b>3.889</b> (0.0e+00) | 573727.029 (2.1e-01)         |
|                 | unconstr. | 777.877                   | 9.341                  | 603572.290                   |
| OMIM            | constr    | <b>420.469</b> (1.4e-190) | <b>4.156</b> (0.0e+00) | <b>680539.251</b> (1.9e-290) |
|                 | unconstr. | 517.556                   | 8.462                  | 719215.473                   |
| cancerMut       | constr    | <b>449.293</b> (1.6e-18)  | <b>6.478</b> (0.0e+00) | <b>1675486.852</b> (0.0e+00) |
|                 | unconstr. | 450.797                   | 9.545                  | 2640773.202                  |
| cancerOverExpr  | constr    | <b>406.059</b> (0.0e+00)  | <b>1.962</b> (0.0e+00) | <b>481943.463</b> (5.9e-61)  |
|                 | unconstr. | 834.754                   | 4.373                  | 696409.173                   |
| cancerUnderExpr | constr    | <b>444.953</b> (0.0e+00)  | <b>2.850</b> (0.0e+00) | <b>566590.538</b> (1.2e-133) |
|                 | unconstr. | 987.238                   | 6.044                  | 949630.946                   |

Table 8. Area under the difference plots (Bossi network, whole distribution, informative terms)

|                 |           | <b>Degree</b>             | <b>Clustering</b>       | <b>Betweenness</b>           |
|-----------------|-----------|---------------------------|-------------------------|------------------------------|
| monogenic       | constr    | <b>10.492</b> (0.0e+00)   | <b>0.359</b> (1.3e-211) | 36515.100 (8.4e-104)         |
|                 | unconstr. | 55.774                    | 0.771                   | 21939.045                    |
| OMIM            | constr    | <b>15.205</b> (6.5e-03)   | <b>0.311</b> (1.5e-229) | <b>47668.962</b> (1.2e-11)   |
|                 | unconstr. | 15.664                    | 0.542                   | 49635.937                    |
| cancerMut       | constr    | <b>174.732</b> (2.1e-237) | 0.528 (1.6e-04)         | <b>171190.850</b> (1.3e-274) |
|                 | unconstr. | 206.454                   | 0.466                   | 204305.710                   |
| cancerOverExpr  | constr    | <b>66.655</b> (0.0e+00)   | <b>0.429</b> (2.5e-303) | <b>32301.476</b> (7.9e-229)  |
|                 | unconstr. | 102.407                   | 0.730                   | 51398.491                    |
| cancerUnderExpr | constr    | <b>51.658</b> (0.0e+00)   | <b>0.420</b> (6.1e-297) | <b>27547.950</b> (6.6e-244)  |
|                 | unconstr. | 100.376                   | 0.940                   | 51960.576                    |

Table 9. Area under the difference plots (HitPredict HT/HC, 25th - 75th percentile, informative terms)

|                 |           | <b>Degree</b>            | <b>Clustering</b>       | <b>Betweenness</b>          |
|-----------------|-----------|--------------------------|-------------------------|-----------------------------|
| monogenic       | constr    | <b>11.078</b> (2.2e-299) | <b>0.278</b> (1.7e-233) | 35564.413 (4.6e-113)        |
|                 | unconstr. | 42.007                   | 0.690                   | 23065.503                   |
| OMIM            | constr    | 33.837 (0.0e+00)         | <b>0.318</b> (1.0e-99)  | 55470.005 (2.4e-01)         |
|                 | unconstr. | 10.947                   | 0.427                   | 54968.662                   |
| cancerMut       | constr    | <b>152.808</b> (0.0e+00) | <b>0.367</b> (1.4e-134) | <b>159653.579</b> (0.0e+00) |
|                 | unconstr. | 209.638                  | 0.457                   | 198565.208                  |
| cancerOverExpr  | constr    | <b>51.047</b> (0.0e+00)  | <b>0.357</b> (0.0e+00)  | <b>20504.216</b> (1.3e-303) |
|                 | unconstr. | 93.638                   | 0.667                   | 45519.636                   |
| cancerUnderExpr | constr    | <b>37.432</b> (0.0e+00)  | <b>0.255</b> (0.0e+00)  | <b>19861.252</b> (3.3e-293) |
|                 | unconstr. | 88.803                   | 0.859                   | 45745.235                   |

Table 10. Area under the difference plots (HitPredict HT/HC, 25th - 75th percentile, all terms)

4

|                 |           | Degree                    | Clustering              | Betweenness                  |
|-----------------|-----------|---------------------------|-------------------------|------------------------------|
| monogenic       | constr    | <b>127.432</b> (5.7e-181) | <b>0.972</b> (5.3e-283) | 660506.131 (4.1e-01)         |
|                 | unconstr. | 219.654                   | 2.763                   | 645083.736                   |
| OMIM            | constr    | <b>89.578</b> (7.8e-290)  | <b>0.659</b> (0.0e+00)  | <b>329548.045</b> (0.0e+00)  |
|                 | unconstr. | 208.110                   | 2.400                   | 866396.372                   |
| cancerMut       | constr    | <b>512.178</b> (0.0e+00)  | <b>2.038</b> (1.3e-204) | <b>970541.785</b> (1.2e-285) |
|                 | unconstr. | 854.108                   | 3.102                   | 1904702.053                  |
| cancerOverExpr  | constr    | <b>262.498</b> (3.5e-135) | 1.196 (7.0e-05)         | 684309.173 (2.5e-36)         |
|                 | unconstr. | 307.496                   | 1.091                   | 549592.607                   |
| cancerUnderExpr | constr    | <b>157.672</b> (4.0e-273) | <b>1.092</b> (3.1e-146) | <b>402879.237</b> (7.4e-72)  |
|                 | unconstr. | 309.937                   | 1.963                   | 633603.131                   |

Table 11. Area under the difference plots (HitPredict HT/HC, whole distribution, informative terms)

|                 |           | Degree                    | Clustering              | Betweenness                 |
|-----------------|-----------|---------------------------|-------------------------|-----------------------------|
| monogenic       | constr    | <b>20.585</b> (3.0e-186)  | <b>0.417</b> (6.1e-180) | 71139.409 (2.9e-183)        |
|                 | unconstr. | 46.039                    | 0.875                   | 49560.227                   |
| OMIM            | constr    | <b>18.355</b> (1.9e-43)   | <b>0.260</b> (0.0e+00)  | 63621.741 (3.3e-02)         |
|                 | unconstr. | 21.049                    | 0.709                   | 62696.523                   |
| cancerMut       | constr    | <b>215.323</b> (1.7e-301) | <b>0.707</b> (3.0e-44)  | <b>179646.929</b> (0.0e+00) |
|                 | unconstr. | 268.268                   | 0.775                   | 226051.050                  |
| cancerOverExpr  | constr    | <b>74.521</b> (0.0e+00)   | <b>0.481</b> (6.4e-306) | <b>34704.895</b> (1.4e-263) |
|                 | unconstr. | 124.498                   | 0.893                   | 58235.376                   |
| cancerUnderExpr | constr    | <b>62.488</b> (0.0e+00)   | <b>0.577</b> (3.1e-294) | <b>38975.349</b> (6.7e-277) |
|                 | unconstr. | 123.181                   | 1.209                   | 69523.613                   |

Table 12. Area under the difference plots (HitPredict Full/HC, 25th - 75th percentile, informative terms)

|                 |           | Degree                   | Clustering              | Betweenness                 |
|-----------------|-----------|--------------------------|-------------------------|-----------------------------|
| monogenic       | constr    | <b>21.238</b> (1.5e-87)  | <b>0.175</b> (4.7e-307) | 61563.627 (5.4e-118)        |
|                 | unconstr. | 35.042                   | 0.938                   | 47896.571                   |
| OMIM            | constr    | 40.259 (0.0e+00)         | <b>0.325</b> (3.5e-301) | 65207.651 (9.5e-01)         |
|                 | unconstr. | 13.240                   | 0.675                   | 65091.417                   |
| cancerMut       | constr    | <b>186.600</b> (0.0e+00) | <b>0.550</b> (7.5e-209) | <b>167295.110</b> (0.0e+00) |
|                 | unconstr. | 270.628                  | 0.745                   | 221327.000                  |
| cancerOverExpr  | constr    | <b>58.528</b> (0.0e+00)  | <b>0.402</b> (0.0e+00)  | <b>24851.049</b> (0.0e+00)  |
|                 | unconstr. | 113.489                  | 0.914                   | 52108.662                   |
| cancerUnderExpr | constr    | <b>49.653</b> (0.0e+00)  | <b>0.584</b> (0.0e+00)  | <b>29727.098</b> (2.0e-288) |
|                 | unconstr. | 108.471                  | 1.236                   | 58590.922                   |

Table 13. Area under the difference plots (HitPredict Full/HC, 25th - 75th percentile, all terms)

|                 |           | Degree                    | Clustering              | Betweenness                  |
|-----------------|-----------|---------------------------|-------------------------|------------------------------|
| monogenic       | constr    | <b>127.432</b> (5.7e-181) | <b>0.972</b> (5.3e-283) | 660506.131 (4.1e-01)         |
|                 | unconstr. | 219.654                   | 2.763                   | 645083.736                   |
| OMIM            | constr    | <b>89.578</b> (7.8e-290)  | <b>0.659</b> (0.0e+00)  | <b>329548.045</b> (0.0e+00)  |
|                 | unconstr. | 208.110                   | 2.400                   | 866396.372                   |
| cancerMut       | constr    | <b>512.178</b> (0.0e+00)  | <b>2.038</b> (1.3e-204) | <b>970541.785</b> (1.2e-285) |
|                 | unconstr. | 854.108                   | 3.102                   | 1904702.053                  |
| cancerOverExpr  | constr    | <b>262.498</b> (3.5e-135) | 1.196 (7.0e-05)         | 684309.173 (2.5e-36)         |
|                 | unconstr. | 307.496                   | 1.091                   | 549592.607                   |
| cancerUnderExpr | constr    | <b>157.672</b> (4.0e-273) | <b>1.092</b> (3.1e-146) | <b>402879.237</b> (7.4e-72)  |
|                 | unconstr. | 309.937                   | 1.963                   | 633603.131                   |

Table 14. Area under the difference plots (HitPredict Full/HC, whole distribution, informative terms)

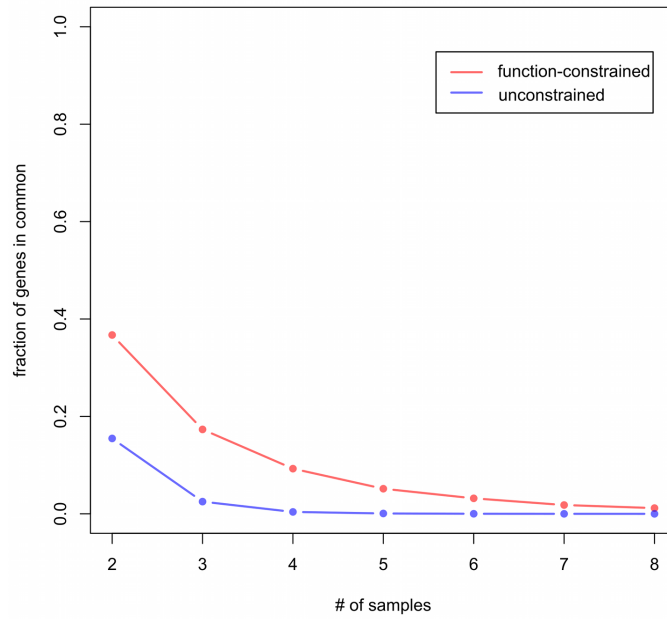

**Figure 1. The function-constrained control samples are sufficiently diverse.** Overlap amongst the samples as an increasing number of function-constrained (red, using Informative Terms) or unconstrained (blue) samples are generated. As a function of the number of function-constrained (respectively, unconstrained) samples, we plot the fraction of genes shared amongst all the samples. The results shown are the average over generating samples 100 times, using the monogenic disorders set as the reference set; error bars are plotted but are too small to be visible.

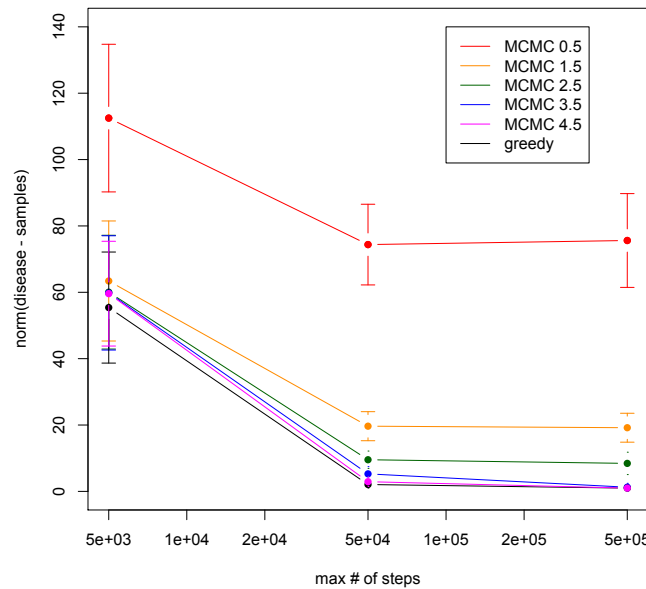

**Figure 2. Comparison of the MCMC and greedy sampling approaches.** To compare the MCMC against the greedy sampling strategy, we generated constrained samples with the MCMC algorithm, varying the parameter  $c$  from 0.5 to 4.5, in 1.0 increments and capping the maximum number of steps to  $50^3$ ,  $50^4$  and  $50^5$ . We then compared the Euclidean norm between the distribution of informative term functional annotations in the disease set versus those found in the samples. The results indicate that for  $c \sim 4.5$  the MCMC reaches the same convergence times of the greedy algorithm.

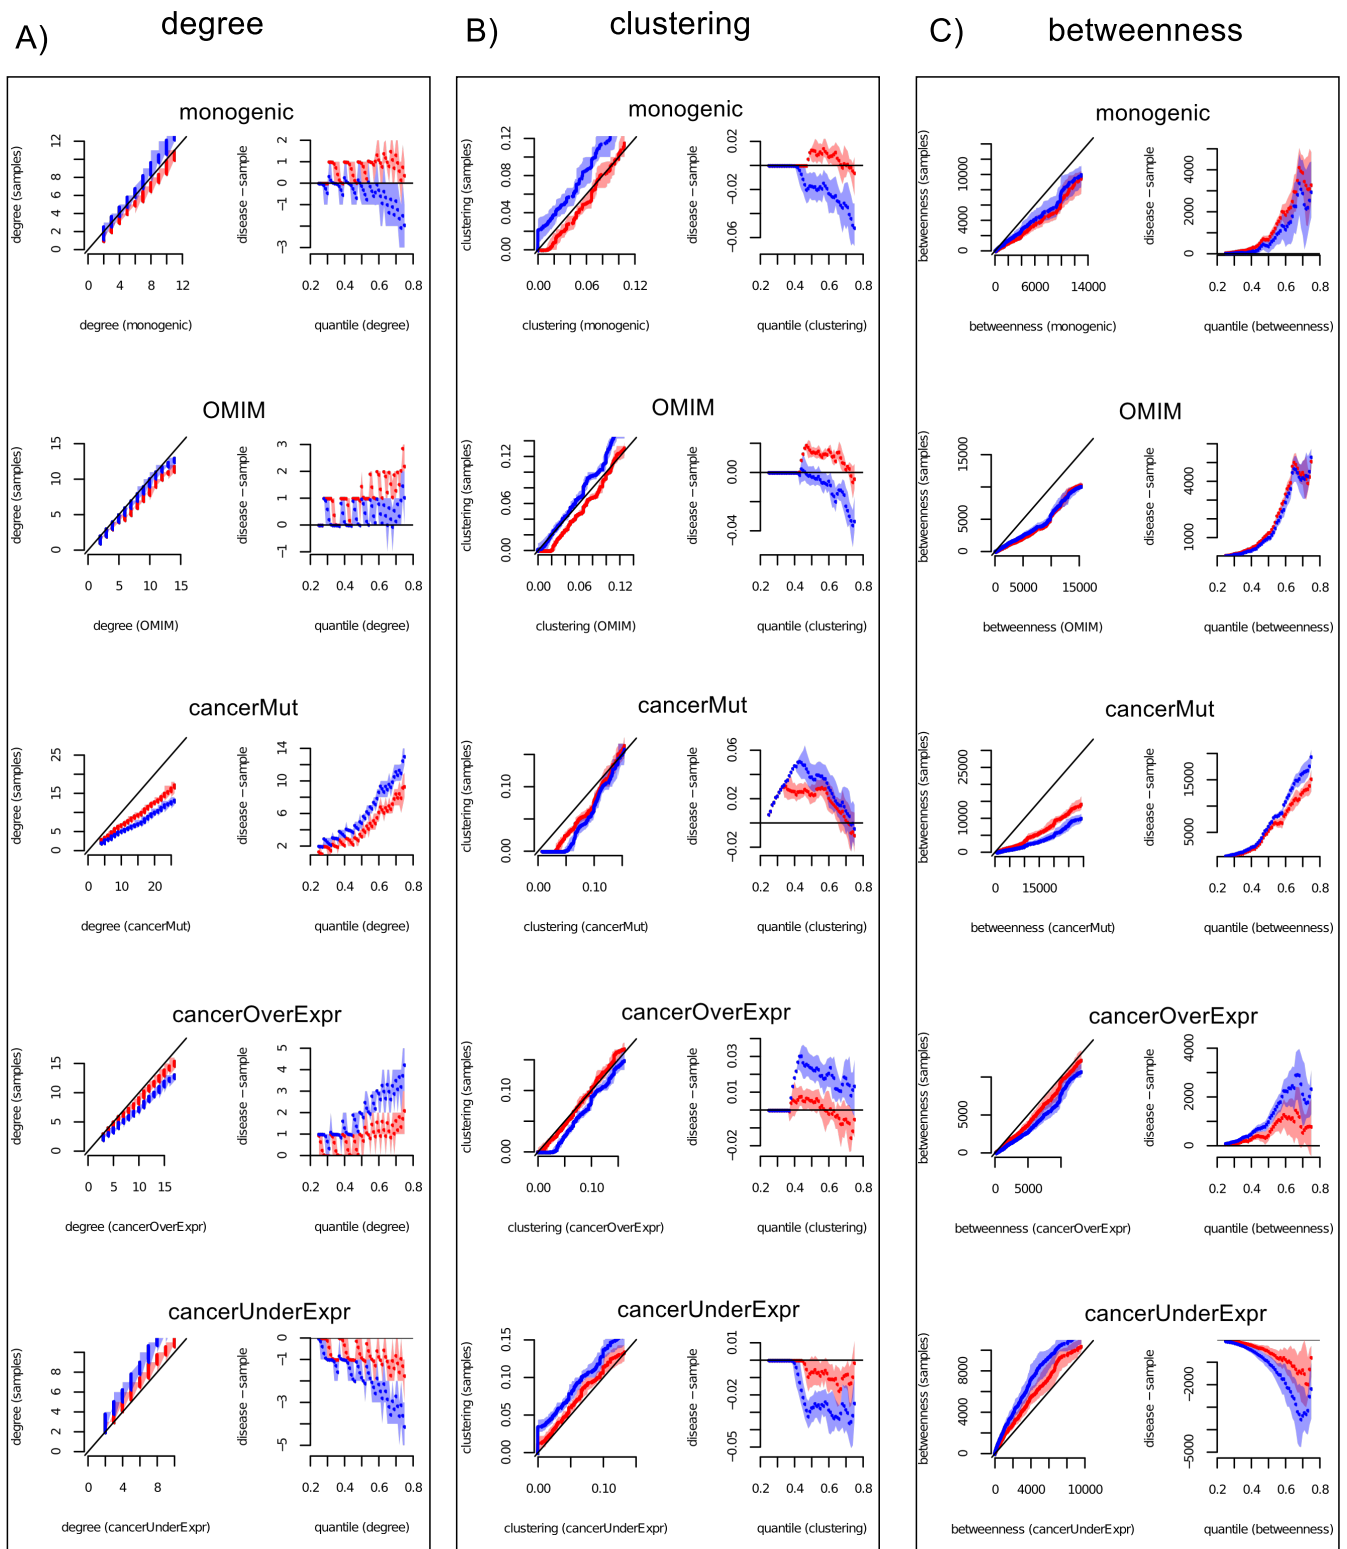

**Figure 3. BioGRID Full, all terms.** Q-Q plots (left-most columns) and difference plots (right-most columns) for degree (A), clustering coefficient (B) and betweenness centrality (C). Function-constrained samples are shown in red, unconstrained samples in blue. The Q-Q plots are obtained by plotting the quantile of the samples against the quantile of the disease sets, in the 25th - 75th percentile range. Difference plots show the difference between the topological property of a disease set at a given quantile and the topological property of the samples at the same quantile. 1000 function-constrained and 1000 unconstrained samples have been generated for each disease set. The shaded areas encompass the interval between the bottom 5% and the top 95% of the values at a given quantile.

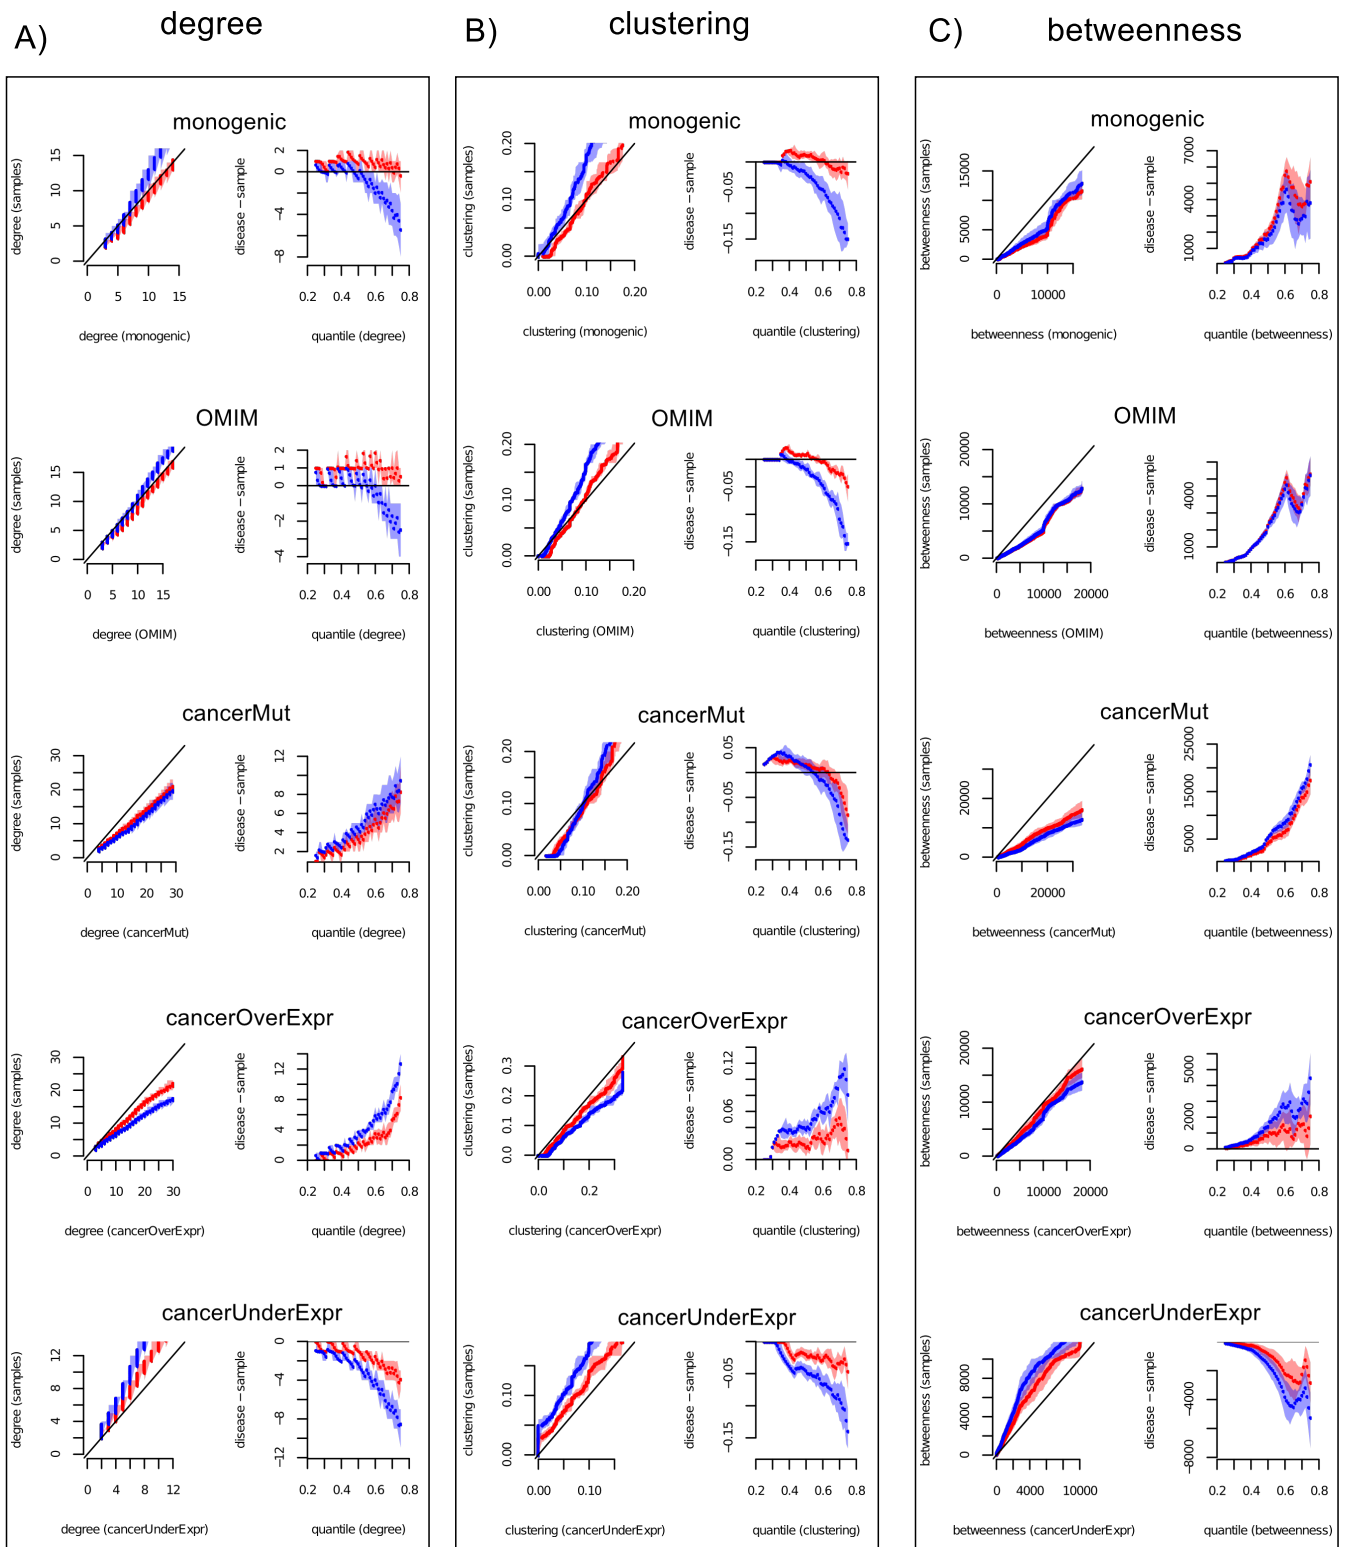

Figure 4. Bossi network, Informative Terms. See caption for Supplementary Figure 3.

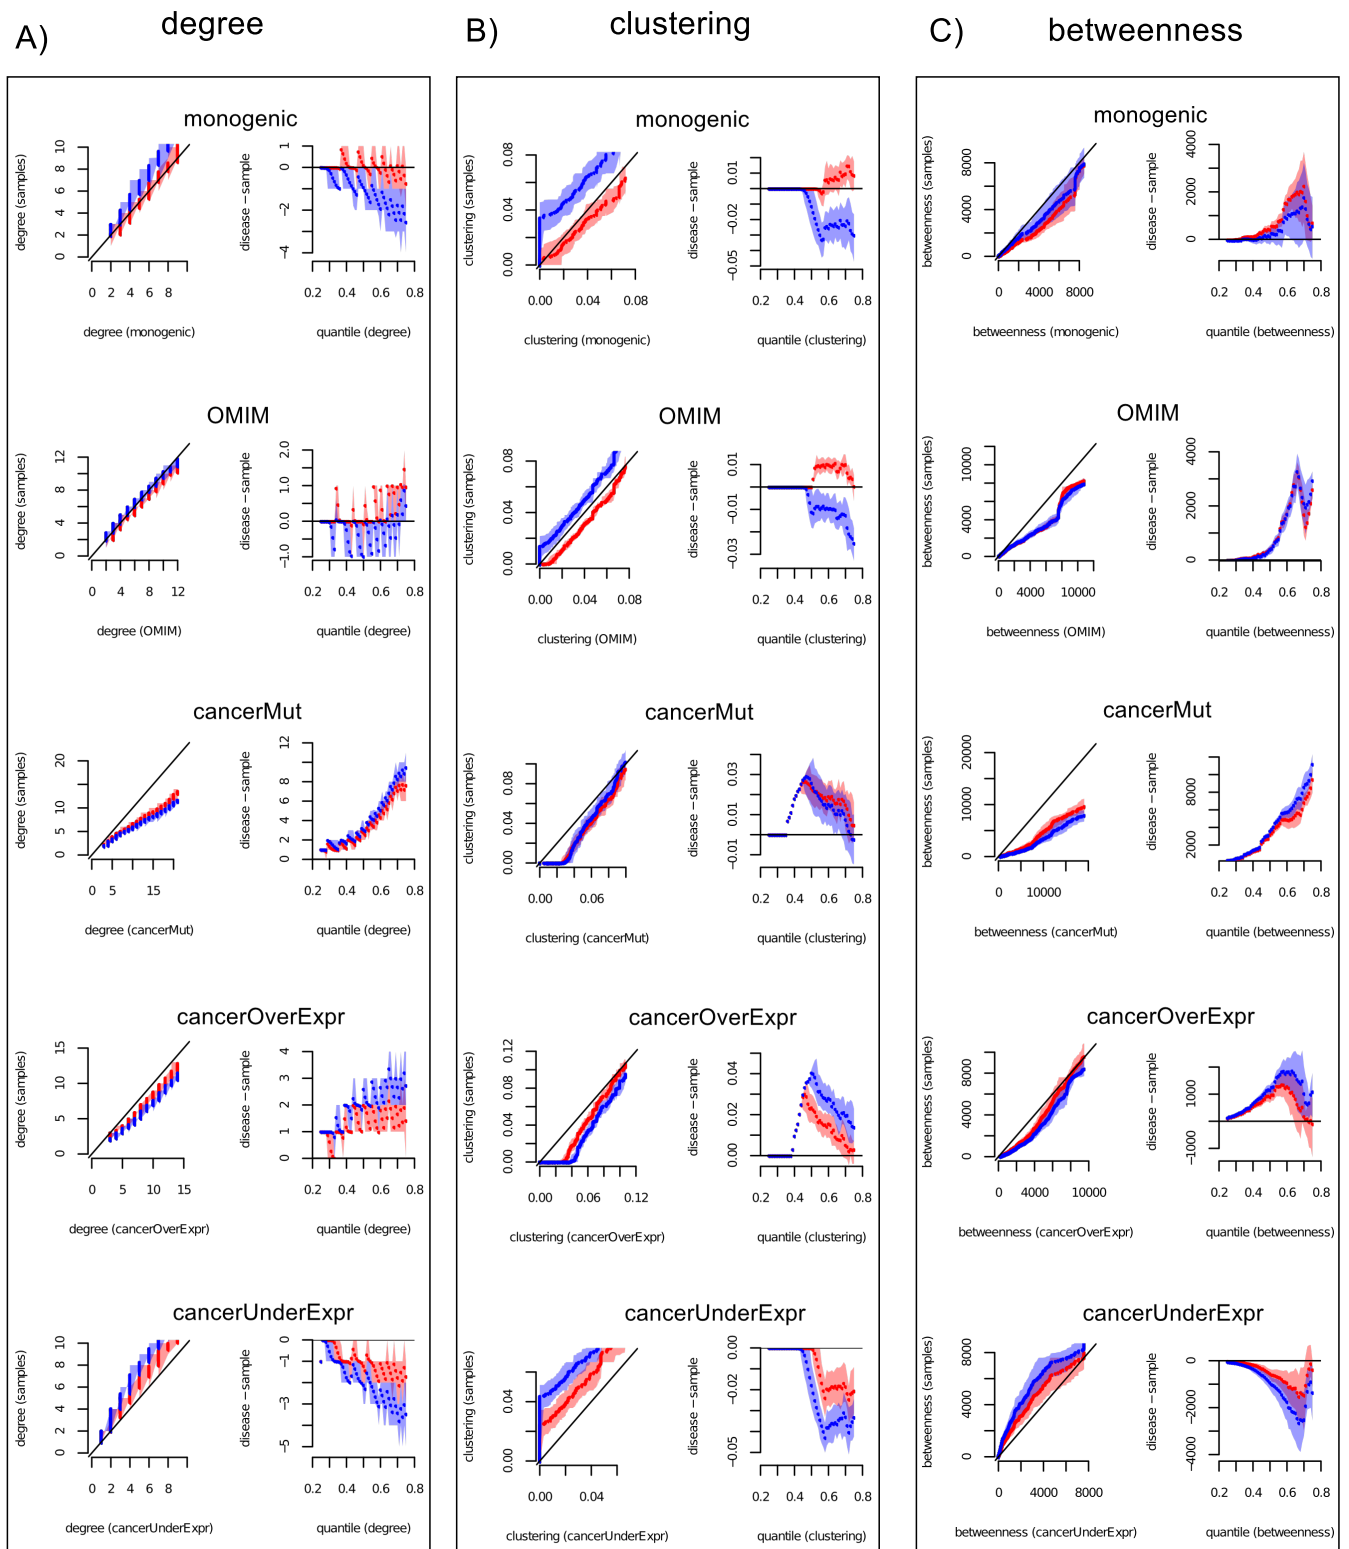

**Figure 5. HitPredict network (High-throughput, High Confidence), Informative Terms.** See caption for Supplementary Figure 3.



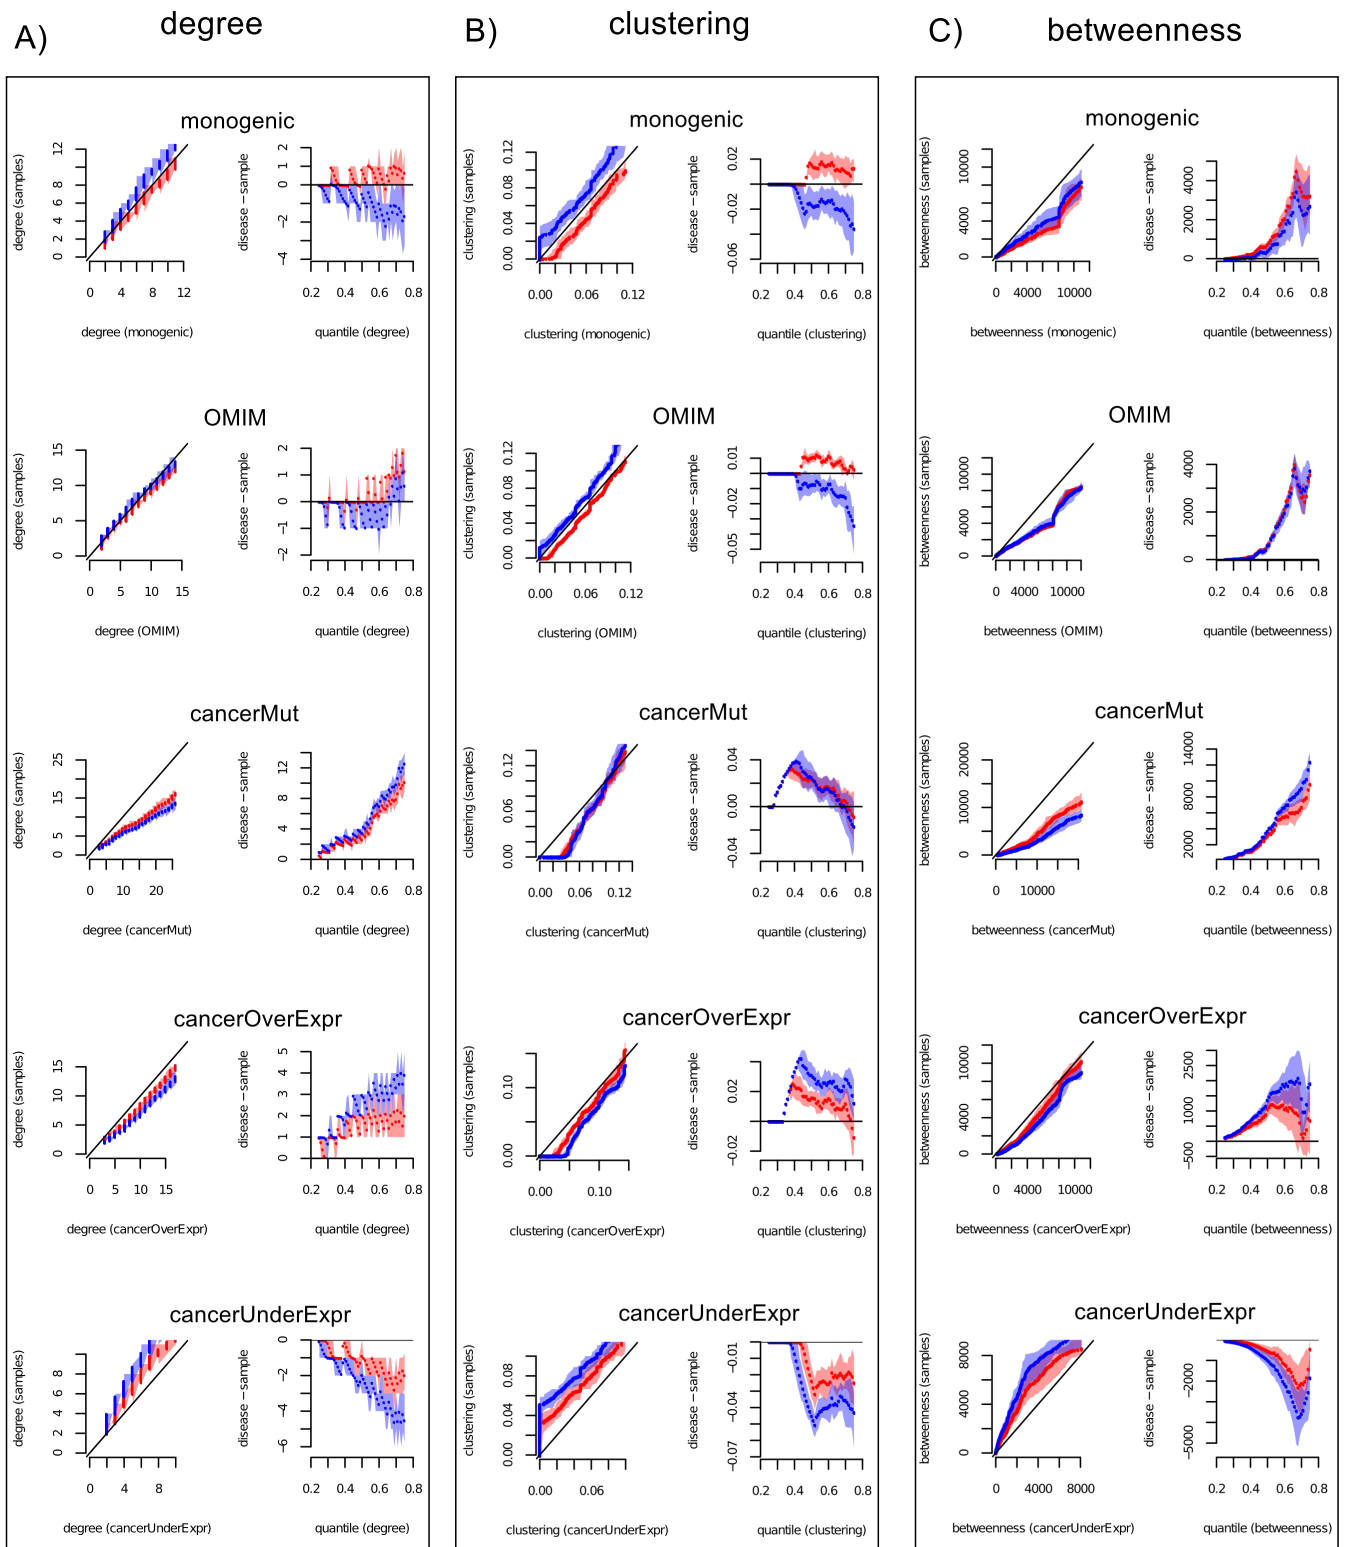

Figure 6. HitPredict network (Full, High Confidence), Informative Terms. See caption for Supplementary Figure 3.

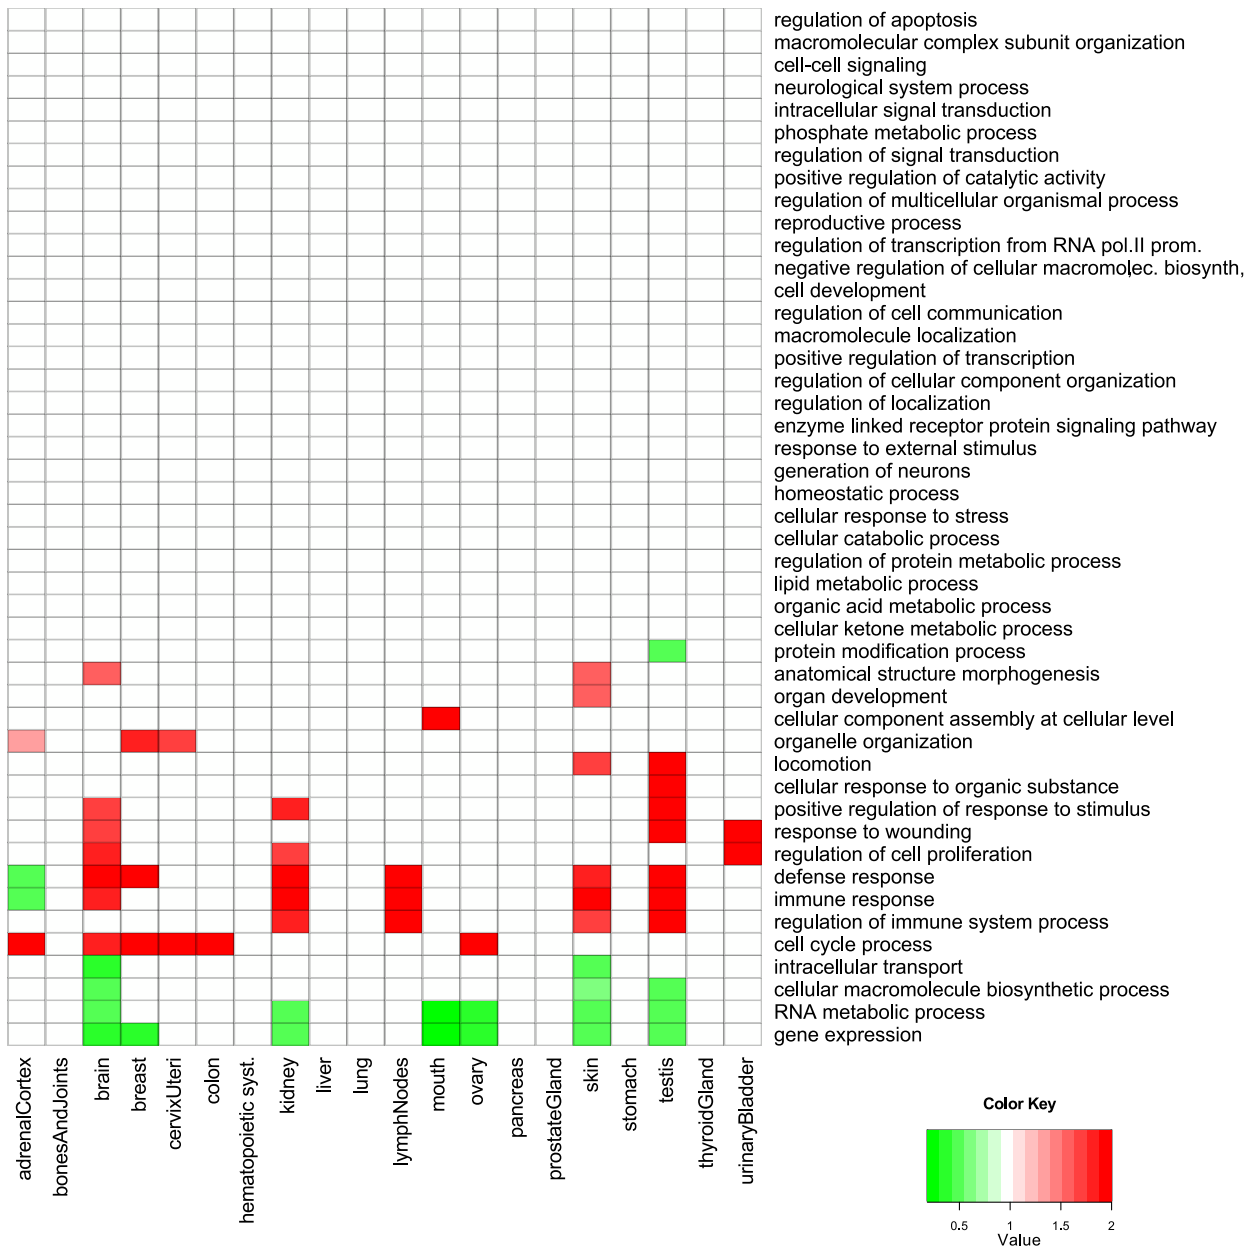

**Figure 7. GO term enrichment and depletion in over-expressed genes, subdivided by anatomical region (IntOGen classification).** For each anatomical region, significantly enriched and under-enriched functions are shown in red and green, respectively ( $p < 0.05$ , Bonferroni-corrected hypergeometric test). The fold enrichment or depletion for each disease set and term is plotted using a red-green gradient and calculated as the ratio of the fraction of genes in the disease set that are annotated by that term to the fraction of all annotated genes that include that term.

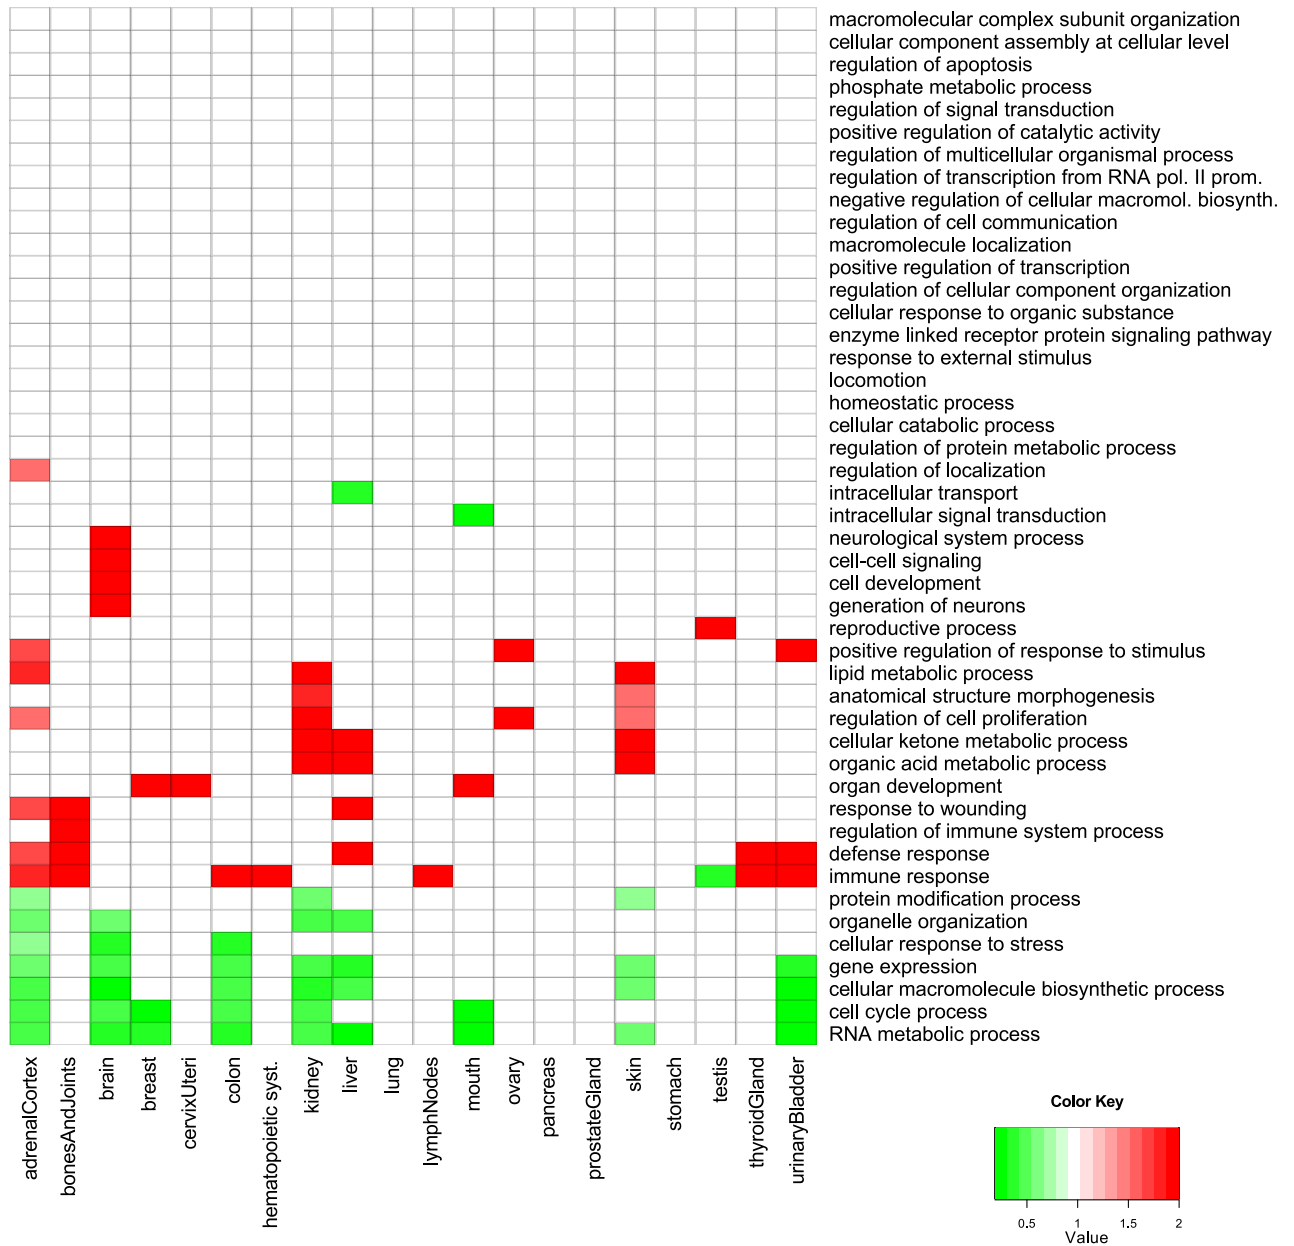

**Figure 8. GO term enrichment and depletion in under-expressed genes, subdivided by anatomical region (IntOGen classification).** For each anatomical location, significantly enriched and under-enriched functions are shown in red and green, respectively ( $p < 0.05$ , Bonferroni-corrected hypergeometric test). The fold enrichment or depletion for each disease set and term is plotted using a red-green gradient and calculated as the ratio of the fraction of genes in the disease set that are annotated by that term to the fraction of all annotated genes that include that term.
